# Supplementary material for: Ionic liquid-assisted growth of methylammonium lead iodide spherical nanoparticles by a simple spin-coating method and photovoltaic properties of perovskite solar cells
Source: Royal Society of Chemistry journal article supplement (doi:10.1039/c5ra08102e), 2015-01-01
Supplement: c5ra08102e1.pdf [file c5ra08102e1.pdf]

## Supporting Information

### **Ionic liquid-assisted growth of methylammonium lead iodide spherical nanoparticles by a simple spin-coating method and photovoltaic properties of perovskite solar cells**

Md. Shahiduzzaman,<sup>a\*</sup> Kohei Yamamoto,<sup>a</sup> Yoshikazu Furumoto,<sup>a</sup> Takayuki Kuwabara,<sup>a,b</sup> Kohshin Takahashi,<sup>a,b</sup> and Tetsuya Taima<sup>a,b\*</sup>

<sup>a</sup>*Graduate School of Natural Science and Technology, Kanazawa University, Kakuma, Kanazawa  
920-1192, Japan*

<sup>b</sup>*Research Center for Sustainable Energy and Technology, Kanazawa University, Kakuma, Kanazawa  
920-1192, Japan*

\*Author for Correspondence

Tel./Fax: +81-76-264-6279

E-mail: shahiduzzaman09@gmail.com (MS); taima@se.kanazawa-u.ac.jp (TT)

**Contents:**

**Table S1.** Peak parameters used to calculate the mean crystalline size in films formed with and without IL by the Scherrer formula.

**Table S1. Peak parameters used to calculate the mean crystalline size in films formed with and without IL using the Scherrer formula.**

| Parameter                             | Perovskite films |            |
|---------------------------------------|------------------|------------|
|                                       | With IL          | Without IL |
| FWHM (B)                              | 0.2401           | 0.2227     |
| Bragg Angle ( $\theta$ ) Primary peak | 14.01            | 14.08      |
| X-ray wavelength ( $\lambda$ )        | 1.54             | 1.54       |
| Constant (K)                          | 0.9              | 0.9        |
| $D_{XRD}$ (nm)                        | 35.8             | 37.5       |
